# Supplementary material for: Solar Light-Induced Photocatalytic Degradation of Sulfamethoxazole by Cobalt Phosphide-Promoted Bismuth Vanadate
Source: MDPI journal article supplement (doi:10.3390/w15071370), 2023-04-03
Supplement: s1 [file s1]

# Solar light-induced photocatalytic degradation of sulfamethoxazole by cobalt phosphide promoted bismuth vanadate

Alexandra A. Ioannidi <sup>1</sup>, Joanne Zappa <sup>1</sup>, Athanasia Petala <sup>2</sup>, Manolis Souliotis<sup>3</sup>,  
Dionissios Mantzavinos<sup>1</sup>, and Zacharias Frontistis <sup>3, 4, \*</sup>

<sup>1</sup> Department of Chemical Engineering, University of Patras, GR-26504 Patras, Greece

<sup>2</sup> Department of Environment, Ionian University, GR-29100 Zakynthos, Greece

<sup>3</sup> Department of Chemical Engineering, University of Western Macedonia, GR-50132, Kozani, Greece

<sup>4</sup> School of Sciences and Engineering, University of Nicosia, Nicosia 2417, Cyprus

## Supplementary Material

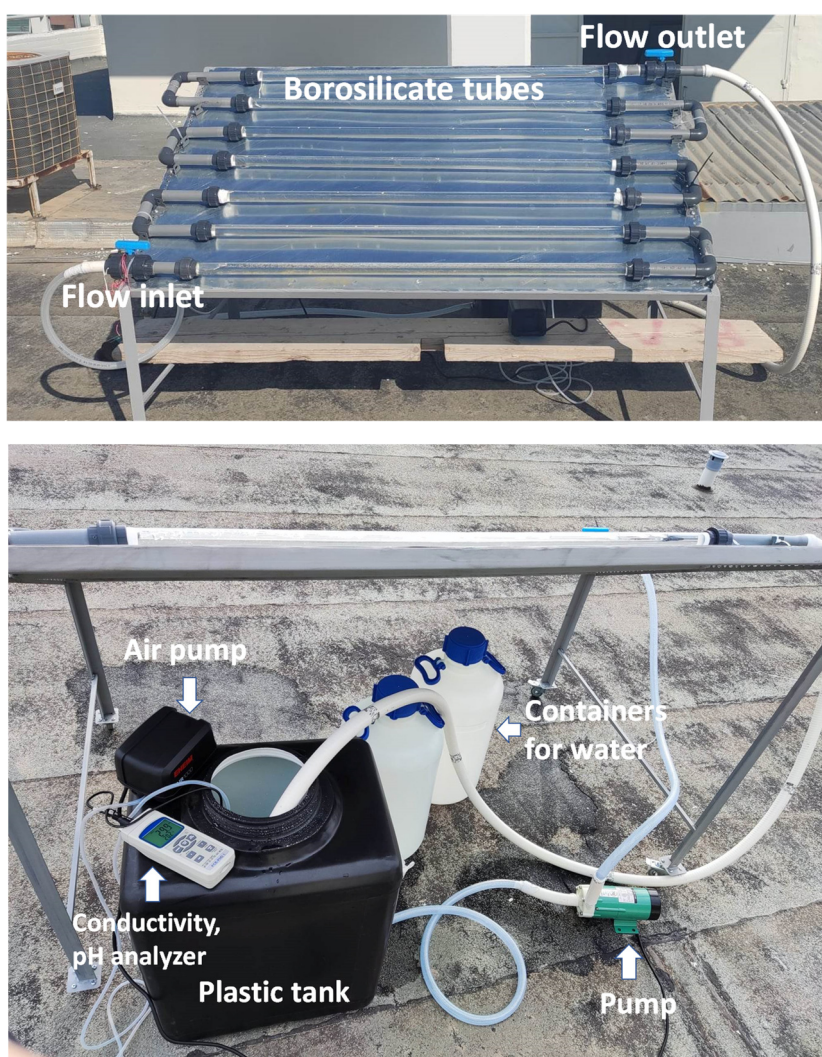

Figure S1. Pilot scale FPC photocatalytic reactor.
