# Supplementary material for: Solar Light-Induced Photocatalytic Degradation of Sulfamethoxazole by Cobalt Phosphide-Promoted Bismuth Vanadate
Source: MDPI journal article supplement (doi:10.3390/w15071370), 2023-04-03
Supplement: s1 [file s1]

Archive with 1 entries (1 files):
- water-2298932-supplementary.pdf
